# Supplementary material for: Structure-based engineering of heparinase I with improved specific activity for degrading heparin
Source: PubMed Central journal article supplement (PMC6688311; doi:10.1186/s12896-019-0553-3), 2019-08-09

**Figure S1** Phylogenetic tree of characterized heparinase I of PL13 family.

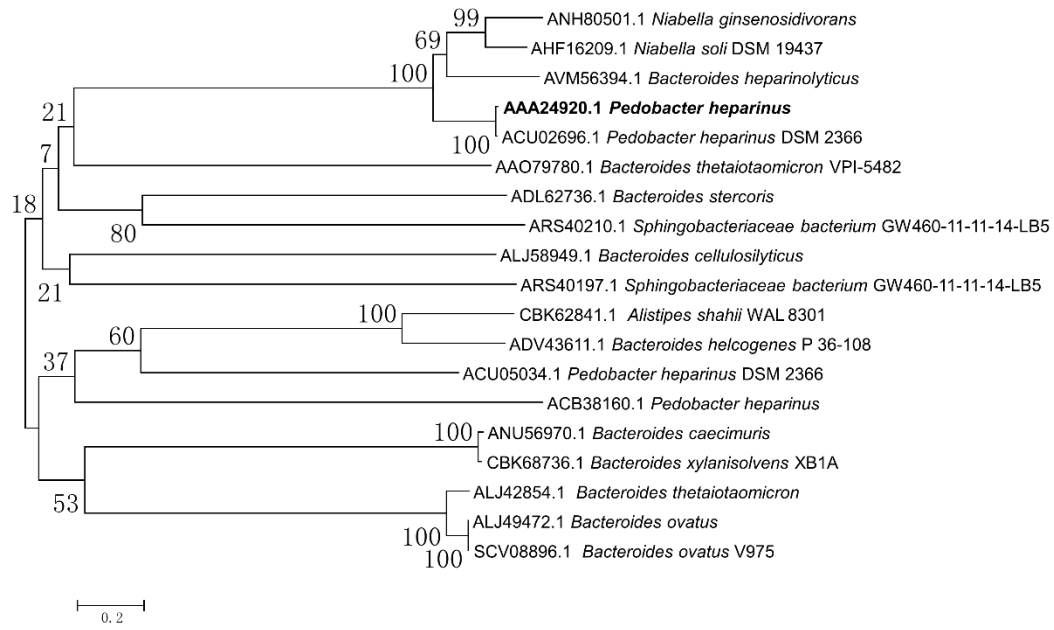

Supplement: 12896_2019_553_MOESM1_ESM.pdf [file 12896_2019_553_MOESM1_ESM.pdf]
