# Supplementary material for: Structure-based engineering of heparinase I with improved specific activity for degrading heparin
Source: PubMed Central journal article supplement (PMC6688311; doi:10.1186/s12896-019-0553-3), 2019-08-09

**Figure S2** The stereochemical spatial arrangement of amino acid residues in the modeled 3D structure of Ph-HepI in favored region of the Ramachandran plot.

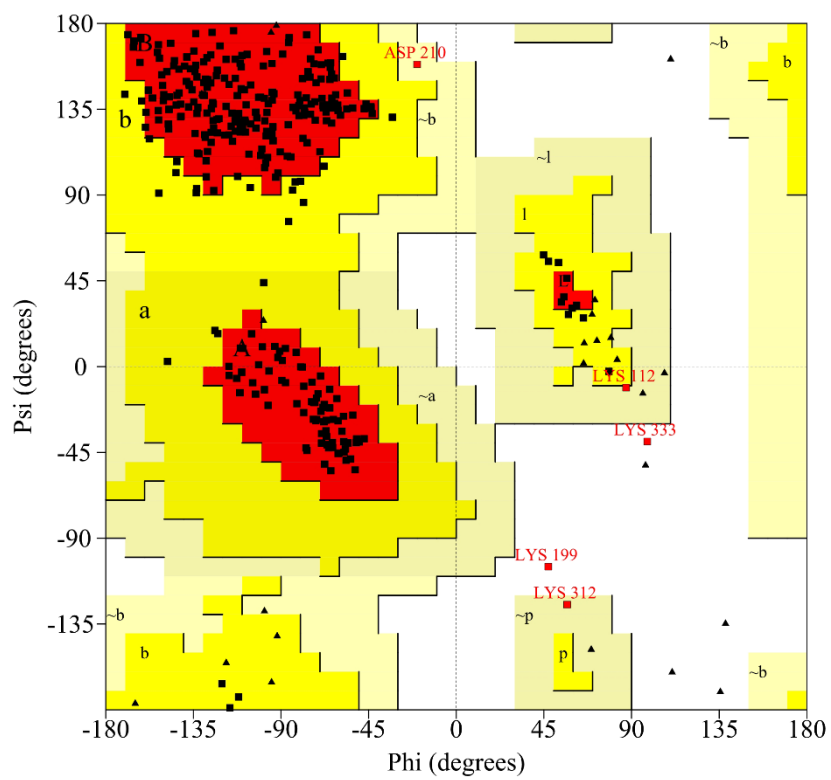

Supplement: 12896_2019_553_MOESM2_ESM.pdf [file 12896_2019_553_MOESM2_ESM.pdf]
