# Supplementary material for: Structure-based engineering of heparinase I with improved specific activity for degrading heparin
Source: PubMed Central journal article supplement (PMC6688311; doi:10.1186/s12896-019-0553-3), 2019-08-09

**Figure S3** Mass spectrometry analysis of degradation products. (a) LMWH standard; (b) Degradation product of Wild-type enzyme; (c) Degradation product of mutant enzyme (S169D); (d) Degradation product of mutant enzyme (A259D); (e) Degradation product of mutant enzyme (S169D/A259D).

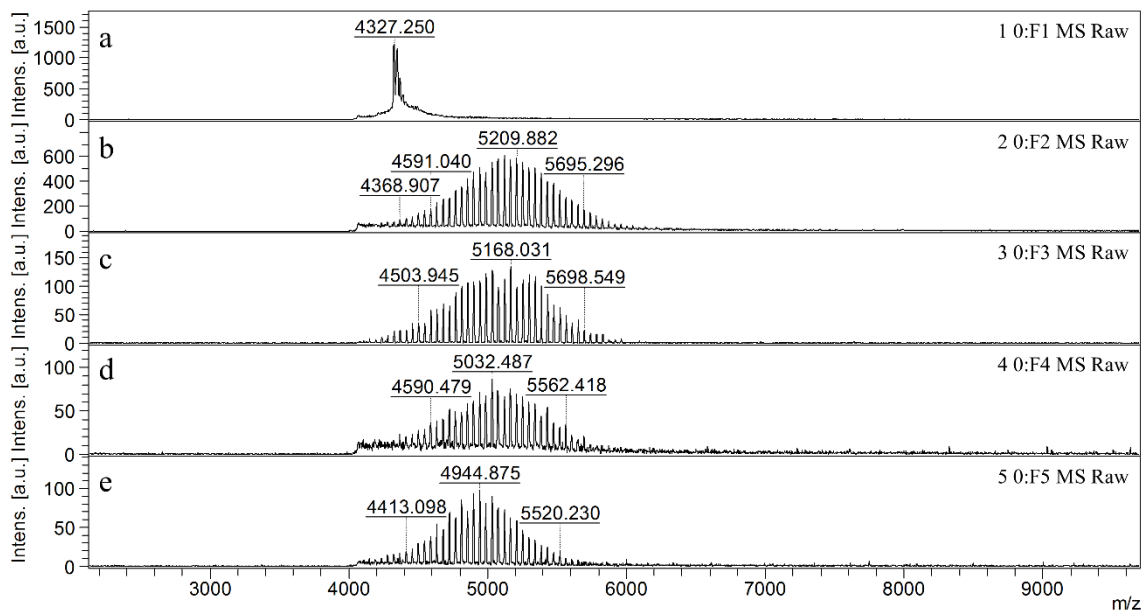

Supplement: 12896_2019_553_MOESM3_ESM.pdf [file 12896_2019_553_MOESM3_ESM.pdf]
